# Supplementary material for: Potential Roles of Oral Microbiota in the Pathogenesis of Immunoglobin A Nephropathy
Source: Front Cell Infect Microbiol. 2021 Apr 2;11:652837. doi: 10.3389/fcimb.2021.652837 (PMC8050349; doi:10.3389/fcimb.2021.652837)
Supplement: Supplementary Table 2 — Specific microbiota with a significant difference between cases and controls. [file Table_2.xlsx]

## Sheet: Supplementary Table 2
Taxanomy	HC1	HC2	HC3	HC4	HC5	HC6	HC7	HC8	HC9	HC10	HC11	HC12	HC13	HC14	HC15	HC16	HC17	HC18	HC19	HC20	HC21	HC22	HC23	HC24	HC25	HC26	HC27	HC28	HC29	HC30	IgAN1	IgAN2	IgAN3	IgAN4	IgAN5	IgAN6	IgAN7	IgAN8	IgAN9	IgAN10	IgAN11	IgAN12	IgAN13	IgAN14	IgAN15	IgAN16	IgAN17	IgAN18	IgAN19
Actinomyces	1.03	0.931	0.461	0.214	1.36	0.902	0.214	2.22	0.243	1.12	0.6	1.22	0.507	0.516	0.164	0.524	1.4	0.306	0.486	1.85	3.28	0.214	1.54	0.721	0.78	0.411	1.28	0.444	0.331	0.218	0.616	0.818	0.294	0.294	1.22	0.231	0.289	0.0923	0.122	0.499	0.352	0.398	0.201	0.444	0.105	0.6	0.453	0.264	0.285
Capnocytophaga	0.377	0.495	0.923	0.256	0.356	1.2	2.52	1.58	0.0461	1.85	0.704	0.704	1.79	0.767	1.43	0.545	0.99	0.642	0.591	0.717	0.83	0.851	0.331	0.453	0.495	0.18	0.13	1.52	0.0671	0.214	0.998	1.3	1.22	1.12	0.608	0.688	4.02	3.11	1.05	1.51	0.524	2.64	1.29	1.33	0.839	0.461	0.813	1.78	0.696
Streptococcus	5.66	20.2	6.78	3.79	3.4	4.5	3.17	19	0.906	6.83	5.32	10.2	11	19.3	8.95	7.71	6.72	2.34	5.05	7.39	9.97	4.58	18.5	3.27	4.26	11.8	1.52	6.31	9.23	6.24	6.22	3.29	5.46	1.38	3.4	15.6	0.885	2.24	3.93	5.23	3.73	2.92	2.15	1.33	1.77	5.71	8.83	1.53	2.13
Veillonella	10.8	6.03	5.67	10.4	12.4	5.04	4.48	2.87	24.8	6.61	10.8	8.64	3.95	6.67	2.29	3.31	10.7	8.86	7.09	15.8	12.5	11.9	15.1	16	7.93	12.6	13.6	4.1	4.96	6.44	3.92	7.9	3.8	3.54	16.4	1.79	2.86	1.24	1.86	1.83	2.62	0.507	4.73	3.87	1.58	2.1	9.09	5.09	8.4
SR1_genera_incertae_sedis	4.36	0.512	0.985	4.83	0.671	0.344	1.21	0.285	0.323	0.00419	0.885	0.0461	0.21	0.0168	0.0419	0.126	0.185	0.0587	0.977	0.101	0	1.66	0.0545	0.0503	0.319	0.0126	0.0168	0.843	0.222	1.4	0.44	1.66	1.54	2.65	0.00839	1.06	2.56	4.81	1.27	1.16	0.822	3.23	7.31	8.17	1.6	0.474	0.943	2.7	3.72
Rothia	0.851	1.11	0.302	0.327	0.453	5.19	1.26	12.4	0.621	1.54	0.595	2.2	1.59	3.12	0.541	2.48	2.42	1.16	1.2	0.377	1.38	0.289	5.88	0.608	4.81	1.52	0.226	0.91	0.608	0.96	0.327	0.876	0.239	0.235	0.0503	0.256	0.382	0.222	0.667	0.83	0.247	4.7	0.453	0.977	0.398	0.751	0.876	0.239	0.226
Megasphaera	0.818	0.222	0.00839	0.214	0.0294	0	0.00839	0.021	0	0.0377	0.159	0.0671	0.0126	0.277	0.0252	0.197	0.843	0.314	0.348	0.268	1.04	0.0252	0.0252	0.0335	0.0545	0.147	0.943	0.0168	0.134	0.226	0.113	0.403	0.021	0.0168	1.96	0.00419	0	0	0	0.0126	0	0	0.00839	0.0461	0	0.0126	0.117	0	0
Gemella	0.256	2.14	0.365	0.168	0.541	0.474	0.331	0.491	0.0881	0.579	0.327	1.38	1.45	3.6	1.86	1.23	0.444	0.281	0.591	0.436	1.43	0.453	0.717	0.26	0.256	1.54	0.126	0.721	0.755	0.667	0.772	0.0797	0.377	0.222	0.189	1.11	0.0629	0.0671	0.507	0.189	0.319	0.0755	0.264	0.0461	0.147	0.252	0.26	0.319	0.122
Dialister	0.189	0.138	0.0461	0.13	0.0629	0.0252	0.222	0.021	0.126	0.0294	0.101	0.164	0.277	0.356	0.218	0.0671	0.0839	0.0629	0.533	0.193	0.0797	0.0671	0.235	0.0587	0.0419	0.298	0.201	0.151	1.07	0.344	0.528	0.164	0.0252	0.0671	0.164	0.0545	0.0419	0.0294	0.021	0.0377	0.226	0.0419	0.0294	0.0881	0.126	0.0335	0.0839	0.0252	0.105
Atopobium	0.495	0.151	0.0461	0.13	0.0923	0.0419	0.0713	0.0629	0.0629	0.0713	0.243	0.0629	0.021	0.222	0.0629	0.176	0.294	0.0629	0.189	0.201	0.226	0.159	0.0713	0.289	0.0419	0.0419	0.465	0.0839	0.235	0.172	0.0461	0.528	0.0294	0.0419	0.453	0.00419	0	0.00419	0.00839	0.0461	0.0671	0.00839	0.0294	0.0964	0.0377	0.0671	0.0629	0.0335	0.0671
Eubacterium	0.352	0.0503	0.302	0.365	0.176	0.101	0.0964	0.0839	0.461	0.168	0.503	0.306	0.138	0.943	0.101	0.113	0.126	0.0671	0.155	0.143	0.0923	0.109	0.0671	0.205	0.0587	0.172	0.113	0.101	0.256	0.252	0.0839	0.159	0.0419	0.0503	0.0335	0.0335	0.0503	0.00419	0.0461	0.0797	0.168	0.0419	0.0461	0.0797	0.0797	0.0629	0.0294	0.0964	0.13
Stomatobaculum	0.159	0.117	0.105	0.0923	0.243	0.00419	0.021	0.0713	0.0587	0.0168	0.138	0.0923	0.134	0.126	0.105	0.0419	0.0377	0.0755	0.176	0.214	0.277	0.39	0.126	0.101	0.0377	0.101	0.0923	0.0461	0.134	0.0461	0.021	0.0671	0.0713	0.0713	0.0587	0.00839	0	0	0	0	0.109	0.00419	0.13	0	0	0.0335	0.0503	0.138	0.0377
Acinetobacter	0.00839	0	0.00419	0	0	0.021	0.00839	0.205	28.9	0.00839	0	0.00419	0.021	0.00839	0.00419	0	0	0.00419	0.00839	0	0.0587	0	0.00419	0	0	0.00419	0	0.00419	0	0	0.00839	0	0	0	0	0	0	0	0	0	0	0	0	0.00839	0	0	0	0	0
Solobacterium	0.193	0.021	0.0168	0.0629	0.122	0.0335	0.0461	0.0545	0.0629	0.0755	0.138	0.0545	0.0629	0.0545	0.0126	0.0839	0.151	0.0964	0.0755	0.113	0.0964	0.201	0.0294	0.218	0.0713	0.0545	0.0839	0.0126	0.0168	0.0126	0.0503	0.0461	0.0419	0.0461	0.0294	0.0252	0.00419	0.00419	0.0587	0.0168	0.021	0.00419	0.0168	0.0252	0.00839	0.0168	0.0126	0.0168	0.00419
Slackia	0	0.00839	0	0	0	0	0	0.00419	0.00419	0	0.00419	0.00839	0	0.0126	0	0	0.00839	0	0.0294	0	0	0	0.021	0.00419	0	0.00419	0	0	0	0	0	0	0	0	0	0	0	0	0	0	0	0	0	0	0	0	0	0	0
Mogibacterium	0.0377	0.00839	0.00839	0.00839	0.0126	0.00419	0.0168	0.00839	0.0252	0	0.0294	0.0126	0.00419	0.00419	0	0.00419	0.0419	0	0.00839	0.00839	0.00419	0.0126	0.00419	0.00839	0	0.00839	0.0168	0.0126	0.0252	0.0126	0.00419	0.00419	0.00419	0	0	0	0	0	0.00419	0	0.00839	0.00419	0	0	0.00419	0.0126	0	0.00419	0.00419
Kingella	0.00419	0.0377	0	0.0294	0.0252	0.00419	0.00419	0.0923	0	0.0252	0.00419	0.0419	0.0294	0.00839	0	0.00839	0.0377	0.00419	0	0.0461	0.0503	0.00839	0.021	0	0.021	0.00419	0	0	0	0.00419	0	0	0	0	0.00419	0	0	0	0	0.00419	0	0	0.00419	0	0	0	0	0	0.00419
Klebsiella	0	0.0126	0	0.00839	0	0	0	0.00419	0	0.00839	0	0.00419	0	0	0	0	0	0	0	0	0.00419	0	0	0.00419	0	0	0.00419	0	4.61	0.231	0	0	0	0	0	0	0	0	0	0	0	0	0	0	0	0	0	0	0
Olsenella	0	0.0419	0	0	0.00419	0.00419	0.00419	0	0	0	0	0	0.00839	0.00839	0.0168	0	0	0	0.00839	0	0	0	0.0126	0	0	0.00839	0	0.00419	0.0168	0	0	0	0	0	0	0	0	0	0	0	0.00419	0	0	0	0	0	0	0	0
[truncated: 16 more columns]
